# Supplementary material for: A Systematic Review with Meta-Analysis of the Effect of Resistance Training on Whole-Body Muscle Growth in Healthy Adult Males
Source: PubMed Central journal article supplement (PMC7068252; doi:10.3390/ijerph17041285), 2020-02-17
Supplement: ijerph-17-01285-s001.pdf [file ijerph-17-01285-s001.pdf]

Supplemental file 1. Main characteristics of the included studies in the present review.

| Measure | Study                  | Hypertrophy measurement | Intervention | N  | Age (y) | Initial Weight (kg) | Height (m) | Training Status                                            | Training Type                  | Study duration (weeks) | Days / week? | n exercises/workout | Rest between exercise (average min) | n set/workout | rep   | Training duration (min) | Average Intensity(1RM) |
|---------|------------------------|-------------------------|--------------|----|---------|---------------------|------------|------------------------------------------------------------|--------------------------------|------------------------|--------------|---------------------|-------------------------------------|---------------|-------|-------------------------|------------------------|
| FFM     | Abe et al. 2000        | DXA                     | ORT          | 17 | 37.7    | 87.6                | 1.78       | Active but resistance untrained                            | Fullbody                       | 12                     | 3            | 6                   |                                     | 8_12          | 1_3   |                         | 65%                    |
| FFM     | Ahtiainen et al. 2011  | Antropometry            | ORT          | 7  | 28.0    | 79.0                | 1.85       | Healthy untrained young adult                              | Fullbody                       | 21                     | 3            | 8                   |                                     | 24            | 5_20  |                         | 63%                    |
| FFM     | Álvarez, et al. 2012   | Antropometry            | ORT          | 5  | 23.9    | 70.8                | 1.77       | Players with previous experience in RT                     | Traditional RT (Split routine) | 18                     | 2_3          | 6                   | 4                                   | 12            | 5_10  |                         | 78%                    |
| FFM     | Álvarez, et al. 2012   | Antropometry            | ORT          | 5  | 24.2    | 68.1                | 1.72       |                                                            | Traditional RT (Split routine) | 18                     | 2_3          | 6                   | 4                                   | 12            | 5_10  |                         | 78%                    |
| FFM     | Alvehus et al. 2014    | DXA                     | ORT          | 17 | 25.3    | 78.6                |            | Healthy young men with slight to moderate experience in RT | Traditional RT (Split routine) | 8                      | 2_4          |                     | 1.5                                 |               | 8_15  |                         |                        |
| FFM     | Arazi et al. 2015      | Antropometry            | RT+PL        | 10 | 22.4    | 74.8                | 1.75       | no RT experience                                           | Fullbody                       | 4                      | 3            | 9                   | 2                                   | 18            | 8_10  |                         | 83%                    |
| FFM     | Arciero et al. 2001    | DXA                     | ORT          | 10 | 20.0    | 78.9                | 1.83       | Active but resistance untrained                            | Fullbody                       | 4                      | 3            | 10                  |                                     | 10            | 3     |                         | 70%                    |
| FFM     | Arciero et al. 2001    | DXA                     | ORT          | 10 | 20.0    | 78.8                | 1.79       |                                                            | Fullbody                       | 4                      | 3            | 10                  |                                     | 10            | 3     |                         | 70%                    |
| FFM     | Bang et al. 2017       | BIA                     | ORT          | 8  | 33.1    | 83.8                |            | ≥ 3 years of RT experience                                 | Traditional RT (Split routine) | 8                      | 6            |                     | 1.25                                | 26            | 10_15 |                         | 70%                    |
| FFM     | Bartolomei et al. 2016 | Antropometry            | ORT          | 10 | 23.7    | 78.5                | 1.77       | ≥ 3 years of RT experience                                 | Traditional RT (Split routine) | 15                     | 4            | 5.5                 | 2                                   | 27.5          | 3_12  |                         | 70%                    |

|     |                        |                |       |    |      |      |      |                                 |                                |    |     |     |      |       |      |     |     |
|-----|------------------------|----------------|-------|----|------|------|------|---------------------------------|--------------------------------|----|-----|-----|------|-------|------|-----|-----|
| FFM | Bartolomei et al. 2016 | Antropometry   | ORT   | 8  | 26.0 | 78.9 | 1.70 |                                 | Tradicional RT (Split routine) | 15 | 4   | 5.5 | 2    | 27.5  | 3_12 | 70% |     |
| FFM | Bartolomei et al. 2018 | Antropometry   | ORT   | 9  | 24.9 | 83.5 | 1.77 | ≥ 4 years of RT experience      | Fullbody                       | 6  | 4   | 6   | 1.5  | 30    | 5_4  | 89% |     |
| FFM | Bartolomei et al. 2018 | Antropometry   | ORT   | 11 | 26.0 | 85.4 | 1.77 |                                 | Fullbody                       | 6  | 4   | 6   | 1.5  | 30    | 4_12 | 78% |     |
| FFM | Bhasin et al. 1996     | Underweighting | ORT   | 9  | 26.0 | 85.5 | 1.81 |                                 |                                | 10 | 3   |     | 6    | 4_5   | 80%  |     |     |
| FFM | Buresh et al 2009      | Underweighting | ORT   | 6  | 25.3 | 84.5 |      | Healthy males                   | Fullbody                       | 10 | 1_2 | 16  | 1    | 2_3   | 10   |     |     |
| FFM | Buresh et al 2009      | Underweighting | ORT   | 6  | 21.5 | 79.8 |      |                                 | Fullbody                       | 10 | 1_2 | 16  | 2.5  | 2_3   | 10   |     |     |
| FFM | Chromiak et al. 2004   | Underweighting | ORT   | 18 | 22.2 | 83.6 |      |                                 | Tradicional RT (Split routine) | 10 | 4   | 6   | 1.75 | 3_10  | 3_4  | 60  |     |
| FFM | Chromiak et al. 2004   | Underweighting | RT+PL | 15 | 22.1 | 79.2 |      | Active but resistance untrained | Tradicional RT (Split routine) | 10 | 4   | 6   | 1.75 | 3_10  | 3_4  | 60  |     |
| FFM | Colquhoun et al. 2017  | Ultrasound     | ORT   | 14 | 23.1 | 79.7 |      | ≥ 3 years of RT experience      | Fullbody                       | 9  | 3   | 5   | 3.5  |       | 1_8  | 85% |     |
| FFM | Crewther et al. 2013   | Antropometry   | ORT   | 12 | 23.6 | 92.4 | 1.80 | ≥ 2 years of RT experience      | Fullbody                       | 6  | 4   | 6   | 2.25 | 21_24 | 3_12 | 60  | 70% |
| FFM | Deruisseau et al. 2004 | Underweighting | ORT   | 13 | 23.0 | 78.8 | 1.79 | ≥ 1 year of RT experience       | Fullbody                       | 13 | 3   | 14  |      | 8_10  | 4    | 60  | 75% |
| FFM | Fu et al. 2017         | BOD POD        | ORT   | 9  | 21.0 | 76.6 | 1.80 | ≥ 3 years of RT experience      | Fullbody                       | 6  | 4   | 9   | 2    | 18    | 8_12 | 45  | 75% |
| FFM | Fu et al. 2017         | BOD POD        | ORT   | 9  | 28.0 | 79.4 | 1.78 |                                 | Fullbody                       | 6  | 2   | 9   | 2    | 36    | 8_12 | 105 | 75% |
| FFM | Gallagher et al. 2000  | Antropometry   | ORT   | 14 | 22.3 | 77.2 | 1.79 | Untrained                       | Fullbody                       | 8  | 3   | 10  | 1.75 | 10    | 3    | 80% |     |

|     |                          |                     |       |    |      |      |        |                                                                      |                                |    |     |     |       |       |       |       |     |
|-----|--------------------------|---------------------|-------|----|------|------|--------|----------------------------------------------------------------------|--------------------------------|----|-----|-----|-------|-------|-------|-------|-----|
| FFM | Gallagher et al. 2000    | Antropometry        | ORT   | 12 | 21.0 | 76.1 | 1.81   |                                                                      | Fullbody                       | 8  | 3   | 10  | 1.75  | 10    | 3     |       | 80% |
| FFM | Garthe et al. 2013       | DXA                 | ORT   | 21 | 19.1 | 70.9 | 1.79   | Elite athletes                                                       | Tradicional RT (Split routine) | 10 | 4   | 4   | 2     | 12_20 | 6_12  |       |     |
| FFM | Garthe et al. 2013       | DXA                 | ORT   | 18 | 19.6 | 75.0 | 1.80   |                                                                      | Tradicional RT (Split routine) | 10 | 4   | 4   | 2     | 12_20 | 6_12  |       |     |
| FFM | Ghahramanloo et al. 2009 | anthropometry       | RT+PL | 9  | 25.4 | 66.0 | 175.80 | Healthy males                                                        | Fullbody                       | 8  | 3   | 4   |       |       | 6_10  |       |     |
| FFM | Hong et al. 2014         | BIA                 | ORT   | 8  | 23.0 | 73.7 | 1.72   | Male college students without experience                             | Tradicional RT (Split routine) | 8  | 3   | 8   | 3     | 21    | 8_12  | 50    | 80% |
| FFM | Hong et al. 2014         | BIA                 | ORT   | 10 | 22.2 | 71.4 | 1.76   |                                                                      | Tradicional RT (Split routine) | 8  | 3   | 8   | 3     | 21    | 8_12  | 50    | 80% |
| FFM | Hu et al. 2009           | BIA                 | ORT   | 48 | 32.2 | 81.5 | 179.80 | Untrained men                                                        |                                | 10 | 2_3 |     |       |       | 10_15 |       | 70% |
| FFM | Huso et al. 2002         | Underwater weighing | RT+PL | 10 | 24.0 | 75.2 | 171.00 | Recreationally actives men                                           | Fullbody                       | 4  | 3   | 7_8 | 1.5   | 8_10  | 3     |       |     |
| FFM | Jang et al. 2017         | DXA                 | RT+PL | 8  | 23.3 | 76.7 | 1.74   | Active                                                               | Fullbody                       | 12 | 3   | 8   | 1     | 24    | 10_12 | 45    | 80% |
| FFM | Joy et al. 2014          | DXA                 | ORT   | 14 | 21.0 | 75.7 | 1.75   | ≥ 1 year of RT experience, ≥3 days/week for the past 6 months        | Tradicional RT (Split routine) | 8  | 3   | 8   | 1.375 | 1     | 6_12  |       |     |
| FFM | Kim et al. 2014          | BIA                 | RT+PL | 9  | 23.6 |      |        | Untrained healthy young men                                          |                                | 12 | 6   |     |       |       |       | 20-50 | 70% |
| FFM | Kon et al. 2014          | BIA                 | ORT   | 7  | 28.2 | 65.8 | 1.70   | ≥ 10 years of RT experience 2-3 times x week No RT the last 6 months | Tradicional RT (Split routine) | 8  | 2   | 2   | 1.5   | 5     | 10    | 20    | 70% |

|     |                      |                     |       |    |      |       |        |                                    |                                |    |     |     |      |      |      |    |     |
|-----|----------------------|---------------------|-------|----|------|-------|--------|------------------------------------|--------------------------------|----|-----|-----|------|------|------|----|-----|
| FFM | Kramer et al. 2009   | DXA                 | RT+PL | 9  |      |       |        | Healthy, recreationally active men | Tradicional RT (Split routine) | 12 | 3   | 10  |      | 3_5  |      |    |     |
| FFM | Kreipke et al. 2015  | DXA                 | RT+PL | 14 | 21.0 | 75.9  | 1.79   | ≥ 1 year of RT experience          | Tradicional RT (Split routine) | 4  | 4   | 6   | 3.5  | 48   | 1_10 | 60 |     |
| FFM | Lemmer et al. 2001   | DXA                 | RT+PL | 10 | 25.0 | 84.4  | 1.77   | Untrained                          | Fullbody                       | 24 | 3   | 7   | 2.5  | 15   | 1_2  |    |     |
| FFM | Li et al. 2014       | Antropometry        | RT+PL | 13 | 22.3 | 76.2  | 1.77   | ≥ 1 year of RT experience          | Tradicional RT (Split routine) | 8  | 3_4 | 2   | 1    | 3    | 8_12 |    |     |
| FFM | Lockwood et al 2017  | DXA                 | ORT   | 15 | 21.8 | 78.9  | 1.78   | ≥ 3 months of RT experience        | Tradicional RT (Split routine) | 8  | 4   | 8   | 1    | 24   | 5_12 |    |     |
| FFM | Lukaski et al. 1996  | DXA                 | RT+PL | 12 | 21.1 | 79.9  | 179.30 | Untrained                          | Fullbody                       | 8  | 5   | 4   |      | 1_12 | 9    | 60 | 75% |
| FFM | Lukaski et al. 1996  | DXA                 | RT+PL | 12 | 23.3 | 79.3  | 177.30 | Untrained                          | Fullbody                       | 8  | 5   | 4   |      | 1_12 | 9    | 60 | 75% |
| FFM | Lukaski et al. 1996  | DXA                 | RT+PL | 12 | 22.3 | 79.2  | 178.00 | Untrained                          | Fullbody                       | 8  | 5   | 4   |      | 1_12 | 9    | 60 | 75% |
| FFM | Mazzetti et al. 2000 | Antropometry        | RT+PL | 10 | 25.2 | 85.9  | 1.76   | ≥ 2 years of RT experience         | Fullbody                       | 12 | 3_4 | 7_8 | 2    | 3_12 | 2_4  |    |     |
| FFM | Mazzetti et al. 2000 | Antropometry        | RT+PL | 8  | 23.8 | 84.5  | 1.78   | ≥ 2 years of RT experience         | Fullbody                       | 12 | 3_4 | 7_8 | 2    | 3_12 | 2_4  |    |     |
| FFM | McCarthy et al. 1995 | Antropometry        | RT+PL | 10 | 27.9 | 82.0  |        | Untrained                          | Fullbody                       | 10 | 3   | 8   | 1.25 | 6    | 3    | 50 |     |
| FFM | Nacleiro et al. 2017 | BOD POD             | RT+PL | 8  | 25.0 | 76.9  | 1.77   | ≥ 2 years of RT experience         | Circuit                        | 8  | 3   | 8   | 1.5  | 24   | 12   | 30 |     |
| FFM | Noonan et al. 1998   | Underwater weighing | RT+PL | 13 | 19.4 | 105.9 | 1.86   | NCAA Football team                 | Tradicional RT (Split routine) | 8  | 4   | 7   | 2.25 | 2_10 | 3    | 60 |     |
| FFM | Oliver et al. 2013   | DXA                 | ORT   | 11 | 25.0 | 81.7  | 1.80   | RT ≥ once a week                   | Fullbody                       | 12 | 4   | 8   | 1.75 | 32   | 10   |    | 68% |
| FFM | Oliver et al. 2013   | DXA                 | ORT   | 11 | 25.0 | 82.5  | 1.80   | the last 2 years                   | Fullbody                       | 12 | 4   | 8   | 1.25 | 32   | 5_10 |    | 68% |
| FFM | Ormsbee et al. 2012  | DXA                 | RT+PL | 11 | 24.0 | 83.7  |        | RT trained (≥2× week; training for | Tradicional RT                 | 6  | 3   | 8   | 1.25 | 24   | 4_10 |    | 80% |

|     |                         |              |       |    |      |      |        |                                                                                      |                                                |             |     |             |      |     |                                      |       |     |
|-----|-------------------------|--------------|-------|----|------|------|--------|--------------------------------------------------------------------------------------|------------------------------------------------|-------------|-----|-------------|------|-----|--------------------------------------|-------|-----|
| FFM | Ormsbee et al. 2013     | DXA          | RT+PL | 11 | 23.6 | 82.2 | 1.81   | ≥12 months). 5,3 years RT trained (≥3× per week; training for ≥12 months). 4,5 years | (Split routine) Tradicional RT (Split routine) | 6           | 3   | 8           | 1.5  | 24  | 4_10                                 | 80%   |     |
| FFM | Pérez-Gómez et al. 2013 | DXA          | RT+PL | 8  | 22.0 | 70.4 | 1.75   | Healthy and physically active                                                        |                                                | 10          |     | 5           | 1.5  |     |                                      | 70%   |     |
| FFM | Piirainen et al. 2008   | BIA          | ORT   | 6  | 19.1 | 70.7 | 1.82   | Healthy Finnish military male conscripts                                             | physical military training                     | 8           |     |             |      |     |                                      |       |     |
| FFM | Piirainen et al. 2008   | BIA          | ORT   | 6  | 18.8 | 72.8 | 1.82   |                                                                                      | physical military training                     | 8           |     |             |      |     |                                      |       |     |
| FFM | Radaelli et al. 2015    | Antropometry | ORT   | 12 | 24.1 | 79.7 | 1.77   | Active but resistance untrained                                                      | Fullbody                                       | 24          | 3   | 10          | 1.75 | 10  | 8_12                                 | 60    |     |
| FFM | Radaelli et al. 2015    | Antropometry | ORT   | 13 | 24.1 | 76.2 | 1.74   | Active but resistance untrained                                                      | Fullbody                                       | 24          | 3   | 10          | 1.75 | 30  | 8_12                                 | 60    |     |
| FFM | Radaelli et al. 2015    | Antropometry | ORT   | 13 | 24.7 | 82.2 | 1.72   | Active but resistance untrained                                                      | Fullbody                                       | 24          | 3   | 10          | 1.75 | 50  | 8_12                                 | 60    |     |
| FFM | Ribeiro et al. 2015     | DXA          | ORT   | 5  | 26.6 | 84.6 | no     |                                                                                      | Fullbody                                       | 4           | 4   | 10.5        | 1.5  | 42  | 6_12                                 | 95    |     |
| FFM | Ribeiro et al. 2015     | DXA          | ORT   | 5  | 26.8 | 85.9 | no     | Professional bodybuilding competitors                                                | Tradicional RT (Split routine)                 | 4           | 6   | 8           | 1.5  | 32  | 6_12                                 | 65    |     |
| FFM | Roberts et al. 2007     | DXA          | ORT   | 16 |      | 87.1 |        | Healthy male resistance                                                              | -                                              | -           | -   | -           |      |     |                                      |       |     |
| FFM | Rogerson et al. 2007    | BIA          | RT+PL | 11 | 19.0 | 87.6 | 180.70 | Elite male rugby league players                                                      | Fullbody                                       | 20 sessions | 5   | 5-6/per day |      | 2   | 2_8 and day for whole body power 1_4 |       |     |
| FFM | Schumann et al. 2014    | DXA          | ORT   | 16 | 30.0 | 78.0 | 1.79   | Moderately physically active                                                         | Tradicional RT (Split routine)                 | 24          | 2_3 | 9           | 2    | 2_5 | 8_10                                 | 30-50 | 83% |

|     |                         |                     |       |    |       |      |        |                                                                        |                                |    |     |    |      |                       |                 |       |     |
|-----|-------------------------|---------------------|-------|----|-------|------|--------|------------------------------------------------------------------------|--------------------------------|----|-----|----|------|-----------------------|-----------------|-------|-----|
| FFM | Schumann et al. 2014    | DXA                 | ORT   | 18 | 30.0  | 78.0 | 1.79   |                                                                        | Tradicional RT (Split routine) | 24 | 2_3 | 9  | 2    | 2_5                   | 8_10            | 30-50 | 83% |
| FFM | Shelmadine et al. 2009  | DXA                 | RT+PL | 9  | 22.8  | 79.3 | 179.49 | Healthy, recreationally active without RT experience                   | Tradicional RT (Split routine) | 7  | 4   | 16 |      | 2 sets / 2 exercise   | 10              |       |     |
| FFM | Snijders et al. 2015    | DXA                 | ORT   | 19 | 21.0  | 80.0 | 1.85   | Active                                                                 | Fullbody                       | 12 | 3   | 4  | 2.25 | 12                    | 8_15            |       | 75% |
| FFM | Spence et al. 2011      | DXA                 | ORT   | 13 | 26.6  | 81.7 | 1.81   | Healthy, untrained male                                                | Tradicional RT (Split routine) | 24 | 3   |    | 1.5  | 2_3                   | 12_15           |       | 75% |
| FFM | Spillane et al. 2009    | DXA                 | RT+PL | 10 | 20.2  | 77.9 | 175.39 | Healthy males (at least twice weekly RT for 1 year prior to the study) | Tradicional RT (Split routine) | 7  | 4   | 16 | 2    | 3                     | 8_10            |       | 75% |
| FFM | Spillane et al. 2011    | DXA                 | RT+PL | 19 | 22.8  | 79.1 | 1.79   |                                                                        | Tradicional RT (Split routine) | 4  | 4   | 8  | 2    | 24                    | 10              |       | 75% |
| FFM | Terzis et al. 2008      | DXA                 | ORT   | 8  | 21.0  | 83.0 | 181.00 | Male physical education students                                       | Fullbody                       | 14 | 2_3 | 9  |      | 2_3                   | 6_10            |       |     |
| FFM | Terzis et al. 2008b     | DXA                 | ORT   | 11 | 22.0  | 85.0 | 1.84   |                                                                        | Fullbody                       | 14 | 2_3 | 9  |      | 2_3 sets; 3_4 minutes | 8RM; 10RM; 6RM; |       |     |
| FFM | Thomson et al. 2009     | BIA                 | ORT   | 17 | 24.0  | 85.0 | 1.80   | ≥ 1 year of RT experience                                              | Fullbody                       | 9  | 3   | 9  |      | 3 sets                | 5_15            |       |     |
| FFM | Tomljanović et al. 2011 | BIA                 | RT+PL | 23 | 22-25 | 82.4 | 1.85   | ≥ 6 months of RT experience                                            | Fullbody                       | 5  | 3   | 4  |      | 16                    | 6_10            |       | 80% |
| FFM | Wilborn, et al. 2010    | Underwater weighing | RT+PL | 13 | 21.0  | 84.0 | 1.80   | Resistance-trained                                                     | Tradicional RT (Split routine) | 8  | 4   | 16 |      | 3/exercise and 2/sets | 5_10            |       |     |
| FFM | Willoughby et al. 2007  | Underwater weighing | RT+PL | 10 | 19.0  | 81.5 | 1.75   | Untrained                                                              | Fullbody                       | 10 | 4   | 10 |      | 3                     | 6_8             | 45    |     |

|     |                        |                     |       |    |      |      |      |                                                                     |                                |    |     |    |     |          |      |         |     |
|-----|------------------------|---------------------|-------|----|------|------|------|---------------------------------------------------------------------|--------------------------------|----|-----|----|-----|----------|------|---------|-----|
| FFM | Willoughby et al. 2014 | DXA                 | RT+PL | 10 | 21.4 | 84.3 | 1.81 | Training at least twice weekly. RT for one year prior to the study. | Traditional RT (Split routine) | 4  | 4   | 9  | 2   | 27       | 10   | 75%     |     |
| FFM | Wilson et al. 2013     | DXA                 | RT+PL | 10 | 23.7 | 85.7 | 1.79 | Resistance-trained males                                            | Traditional RT (Split routine) | 12 | 3   | 10 |     | 30       | 3_14 |         |     |
| FFM | Wilson et al. 2014     | DXA                 | ORT   | 9  | 21.6 | 87.1 | 1.81 |                                                                     | Traditional RT (Split routine) | 12 | 3_5 | 11 |     | 3_5      | 3_14 |         |     |
| FFM | Zamani et al. 2017     | BIA                 | ORT   | 10 | 21.2 | 66.5 | 1.76 | Untrained                                                           | Fullbody                       | 8  | 3   | 6  | 2   | 24       | 6_8  | 83%     |     |
| FFM | Zamani et al. 2017     | BIA                 | ORT   | 10 | 24.2 | 70.0 | 1.70 | Untrained                                                           | Traditional RT (Split routine) | 8  | 3   | 6  | 2   | 24       | 6_8  | 83%     |     |
| FFM | Zamani et al. 2017     | BIA                 | ORT   | 10 | 21.0 | 65.1 | 1.74 | Untrained                                                           | Traditional RT (Split routine) | 8  | 3   | 6  | 2   | 24       | 6_8  | 83%     |     |
| LMM | Alcaraz et al. 2011    | DXA                 | ORT   | 11 | 22.7 | 75.2 | 1.76 | ≥ 1 year of RT experience                                           | Fullbody                       | 8  | 3   | 6  | 3   | 27       | 6    | 105_125 | 88% |
| LMM | Alcaraz et al. 2011    | DXA                 | ORT   | 15 | 22.7 | 75.2 | 1.76 |                                                                     | Circuit                        | 8  | 3   | 6  | 0   | 27       | 6    | 55_78   | 88% |
| LMM | Alvehus et al. 2014    | DXA                 | ORT   | 17 | 25.3 | 76.8 |      | Healthy young men with slight to moderate experience in RT          | Traditional RT (Split routine) | 8  | 2_4 |    | 1.5 |          | 8_15 |         |     |
| LMM | Andre et al. 2016      | DXA                 | ORT   | 9  | 20.2 | 84.6 | 1.79 | ≥ 3 years of RT experience                                          | Traditional RT (Split routine) | 8  | 4   | 8  | 2   | 24       | 4_12 | 75%     |     |
| LMM | Ara et al. 2007        | DXA                 | ORT   | 12 | 22.7 | 74.7 | 1.74 | Familiar with strength training                                     | lower limbs                    | 6  | 3   | 5  |     |          | 3_10 | 70%     |     |
| LMM | Bemben et al. 2001     | Underwater weighing | ORT   | 8  | 19.0 | 95.7 | 1.88 | NCAA Soccer players                                                 | Fullbody                       | 9  | 4   | 10 | 4   | 8_12/2_4 | 75   | 85%     |     |

|     |                       |                     |       |    |       |      |        |                                                 |                                |    |   |      |     |       |      |     |
|-----|-----------------------|---------------------|-------|----|-------|------|--------|-------------------------------------------------|--------------------------------|----|---|------|-----|-------|------|-----|
| LMM | Brown et al. 1999     | Underwater weighing | ORT   | 10 | 23.3  | 81.1 | 1.78   | Untrained                                       | Fullbody                       | 8  | 3 | 10   | 3   | 8_10  | 83%  |     |
| LMM | Burke et al. 2001     | DXA                 | RT+PL | 5  | 18_31 | 80.0 |        | 4.2 years of RT experience                      | Traditional RT (Split routine) | 6  | 4 | 7_9  | 1.5 | 6_12  |      |     |
| LMM | Caldow et al. 2015    | DXA                 | ORT   | 10 | 21.2  | 75.4 | 1.80   | ≥ 6 months of RT experience                     | Fullbody                       | 12 | 3 | 8    | 1   | 24    | 8_12 | 80% |
| LMM | Chycki et al. 2016    | DXA                 | ORT   | 6  | 21.0  | 80.6 | 1.79   |                                                 | Fullbody                       | 6  | 2 | 2    | 3   | 16    | 10   | 70% |
| LMM | Chycki et al. 2016    | DXA                 | ORT   | 6  | 22.0  | 81.1 | 1.77   | ≥ 3 years of RT experience                      | Fullbody                       | 6  | 2 | 2    | 3   | 16    | 10   | 70% |
| LMM | Chycki et al. 2016    | DXA                 | RT+PL | 6  | 22.0  | 81.1 | 1.77   |                                                 | Fullbody                       | 6  | 2 | 2    | 3   | 16    | 10   | 70% |
| LMM | Deyssig et al. 1993   | Anthropometry       | ORT   | 11 | 23.4  |      |        |                                                 | ≥6 months of RT experience     |    | 6 |      |     |       |      |     |
| LMM | Escalante et al. 2016 | DXA                 | ORT   | 10 | 25.6  | 88.6 | 1.74   | ≥1 year of RT experience                        | Fullbody                       | 8  | 3 | 6    | 3   |       | 1_12 |     |
| LMM | Fahey and Brown 1973  | Underwater weighing | RT+PL | 13 |       | 75.0 |        | ≥1 year of RT experience                        | Fullbody                       | 9  | 3 | 5    | 4   | 5     |      |     |
| LMM | Falk et al. 2003      | Underwater weighing | RT+PL | 15 | 22.7  | 88.3 | 179.80 | ≥2 years of experience                          | Traditional RT (Split routine) | 8  | 4 | 5_14 |     | 5_12  |      | 70% |
| LMM | Falk et al. 2003      | Underwater weighing | RT+PL | 13 | 21.8  | 82.9 | 179.40 |                                                 | Traditional RT (Split routine) | 8  | 4 | 5_14 |     | 5_12  |      | 70% |
| LMM | Fyfe et al. 2016      | DXA                 | ORT   | 8  | 29.5  | 82.6 | 1.81   | Active                                          | Fullbody                       | 8  | 3 | 5    | 2.5 | 20    | 4_14 | 78% |
| LMM | Garthe et al. 2013    | DXA                 | ORT   | 21 | 19.1  | 70.9 | 1.79   | Elite athletes (3.8 h x week strength training) | Traditional RT (Split routine) | 10 | 4 | 4    | 2   | 12_20 | 6_12 |     |
| LMM | Garthe et al. 2013    | DXA                 | RT+PL | 18 | 19.6  | 75.0 | 1.80   |                                                 | Traditional RT (Split routine) | 10 | 4 | 4    | 2   | 12_20 | 6_12 |     |



|     |                       |                     |       |    |       |       |        |                                                                                        |                                |    |     |       |      |      |       |      |     |
|-----|-----------------------|---------------------|-------|----|-------|-------|--------|----------------------------------------------------------------------------------------|--------------------------------|----|-----|-------|------|------|-------|------|-----|
| LMM | Glowacki et al. 2004  | Underwater weighing | ORT   | 13 | 23.0  | 72.8  | 1.76   | Untrained                                                                              | Fullbody                       | 12 | 2_3 | 8     | 3    | 6_10 |       | 80%  |     |
| LMM | Gobbo et al. 2013     | DXA                 | ORT   | 15 | 23.1  | 72.2  | 1.78   | University students, engaged in RT programs during the last 4 months before the study. |                                |    | 8   | 4     | 8    | 1.5  | 32    | 6_12 |     |
| LMM | Harber et al. 2004    | Underwater weighing | ORT   | 8  | 23.6  | 80.9  |        | Untrained                                                                              | Circuit                        | 10 | 3   | 10    |      |      |       |      | 50% |
| LMM | Hoffman et al. 2009   | DXA                 | ORT   | 13 | 19.6  | 102.3 | 1.83   | Strength and power athlete                                                             | Traditional RT (Split routine) | 10 | 4   | 20    |      | 3_4  | 4_10  |      |     |
| LMM | Hoffman et al. 2012   | DXA                 | ORT   | 9  | 22.5  | 89.4  | 1.80   | ≥1 year of training experience                                                         | Traditional RT (Split routine) | 8  | 4   | 9_10  | 1.5  | 29   | 10_12 |      | 70% |
| LMM | Ihalainen et al. 2017 | DXA                 | ORT   | 31 |       | 81.1  |        | Active but RT untrained                                                                | Fullbody                       | 12 | 2.5 | 9     | 2    | 22.5 | 4_12  |      | 73% |
| LMM | Ihalainen et al. 2017 | DXA                 | RT+PL | 37 |       | 84.9  |        |                                                                                        | Fullbody                       | 12 | 2.5 | 9     | 2    | 22.5 | 4_12  |      | 85% |
| LMM | Joy et al. 2016       | DXA                 | RT+PL | 11 |       |       |        | Resistance-trained                                                                     | Fullbody                       | 10 | 3   | 8     | 2.75 | 32   | 1_12  | 60   | 80% |
| LMM | Joy et al. 2016       | DXA                 | RT+S  | 10 | 27.2  | 82.8  | 1.73   |                                                                                        | Fullbody                       | 10 | 3   | 8     | 2.75 | 32   | 1_12  | 60   | 80% |
| LMM | Kelly et al, 1998     | Underwater weighing | ORT   | 9  | 26.8  |       |        | ≥2 years of RT experience                                                              | Traditional RT (Split routine) | 4  | 2   | 4     | 3    | 6_10 |       |      |     |
| LMM | Kerksick et al 2009   | DXA                 | ORT   | 24 | 19.8  | 81.3  | 1.79   | Healthy male                                                                           | Traditional RT (Split routine) | 8  | 4   | 14_16 | 1    | 3    | 8_10  |      |     |
| LMM | Kerksick et al. 2006  | DXA                 | ORT   | 11 |       | 85.1  |        | Healthy male                                                                           | Fullbody                       | 10 | 4   | 7_8   | 1.5  | 3    | 6_10  |      | 80% |
| LMM | King et al. 1999      | Underwater          | RT+PL | 9  | 19_29 | 80.6  | 176.80 | Not currently engaged in RT                                                            | Fullbody                       | 8  | 3   | 10    | 3    | 8_10 |       | 83%  |     |

|     |                     |                     |       |    |      |      |        |                                                                     |                                |    |     |       |      |       |       |        |     |
|-----|---------------------|---------------------|-------|----|------|------|--------|---------------------------------------------------------------------|--------------------------------|----|-----|-------|------|-------|-------|--------|-----|
| LMM | Ko and Choi 2013    | weighing<br>BIA     | ORT   | 18 | 23.8 | 76.9 | 1.75   | University students                                                 |                                | 8  | 3   | 9     |      | 36    | 8_15  | 30_60  | 65% |
| LMM | Kreider et al. 2002 | DXA                 | ORT   | 23 | 23.0 | 82.0 | 1.79   | ≥1 year of RT                                                       |                                | 4  |     |       | 3    | 6_10  |       |        |     |
| LMM | Lemon et al. 1992   | Underwater weighing | ORT   | 12 | 22.4 | 81.9 | 1.81   | Active but without RT experience                                    | Traditional RT (Split routine) | 4  | 6   | 5_8   | 4    | 10    |       |        | 78% |
| LMM | Io et al. 2011      | DXA                 | ORT   | 10 | 20.2 | 65.0 | 1.70   | Nonathletic male students                                           | Fullbody                       | 24 | 3   | 11    |      | 16.5  | 4_15  |        | 83% |
| LMM | Lowery et al. 2014  | DXA                 | RT+PL | 12 | 21.3 |      |        | ≥ 1 year RT                                                         | Traditional RT (Split routine) | 8  | 3   | 7_8   | 1.5  | 21_24 | 6_15  |        |     |
| LMM | Mangine et al. 2008 | anthropometry       | ORT   | 8  | 21.4 | 82.7 | 176.80 | Previous lifting experience                                         | Fullbody                       | 8  | 3   | 12_16 | 2    | 3_5   | 3_10  |        | 55% |
| LMM | Mangine et al. 2008 | anthropometry       | ORT   | 9  | 20.1 | 81.0 | 180.80 |                                                                     | Fullbody                       | 8  | 3   | 12_16 | 2.5  | 3_4   | 6_10  |        | 85% |
| LMM | Mayhew et al. 2009  | DXA                 | ORT   | 21 | 27.9 | 75.4 | 170.40 | Healthy untrained                                                   | lower limbs                    | 16 | 3   | 3?    |      | 3     | 8_12  |        |     |
| LMM | Miller et al. 1984  | Underwater weighing | RT+PL | 8  |      | 70.5 |        | Untrained students                                                  | Fullbody                       | 10 | 3   | 10    | 3    | 8     |       | 90_120 |     |
| LMM | Moore et al. 2007   | DXA                 | RT+PL | 12 | 22.0 | 78.5 |        | recreationally active (not engaged in any RT)                       | Fullbody                       | 12 | 5   | 13    |      | 2_3   | 6_12  |        | 83% |
| LMM | Nybo et al. 2010    | DXA                 | ORT   | 8  | 36.0 | 95.0 |        | Untrained men                                                       | lowr limbs                     | 12 | 2_3 | 6     |      |       | 6_16  | 60     |     |
| LMM | Oliver et al. 2013  | DXA                 | ORT   | 11 | 25.0 | 81.7 | 1.80   | RT at least once a week for the previous 2 years. 6.5 years trained | Fullbody                       | 12 | 4   | 8     | 1.75 | 32    | 10    |        | 68% |
| LMM | Oliver et al. 2013  | DXA                 | RT+PL | 11 | 25.0 | 82.5 | 1.80   | RT at least once a week for the previous 2 years. 6.0 years trained | Fullbody                       | 12 | 4   | 8     | 1.25 | 32    | 5_10  |        | 68% |
| LMM | Paoli et al. 2017   | DXA                 | ORT   | 18 | 23.5 | 80.0 | 1.82   |                                                                     | Fullbody                       | 8  | 3   | 4.5   | 1.75 | 18    | 12_18 |        |     |

|     |                          |                     |       |    |       |      |        |                                   |                                |    |     |   |      |      |       |       |     |
|-----|--------------------------|---------------------|-------|----|-------|------|--------|-----------------------------------|--------------------------------|----|-----|---|------|------|-------|-------|-----|
| LMM | Paoli et al. 2017        | DXA                 | ORT   | 18 | 25.5  | 80.7 | 1.85   | Soccer players without experience | Fullbody                       | 8  | 3   | 4 | 2.75 | 16   | 6_8   |       |     |
| LMM | Peeters et al. 1999      | Anthropometry       | ORT   | 14 | 21.2  | 86.4 | 1.78   | ≥2 years of RT experience         | Traditional RT (Split routine) | 6  | 4   | 3 | 5    | 4_10 |       | 78%   |     |
| LMM | Pérez-Gómez et al. 2013  | DXA                 | ORT   | 8  | 22.0  | 70.4 | 1.75   | Healthy and physically active     |                                | 10 |     | 5 | 1.5  |      |       | 70%   |     |
| LMM | Peronnet et al. 1986     | Underwater weighing | RT+PL | 7  | 19.0  | 80.0 | 1.76   | Actives                           | Fullbody                       | 8  | 3   | 7 | 3    | 5    | 2     | 45    |     |
| LMM | Saremi et al. 2010       | DXA                 | RT+PL | 8  | 23.9  | 77.6 | 1.80   | Healthy non-RT young men          | Fullbody                       | 8  | 3   | 6 | 2    | 3    | 8_10  | 65%   |     |
| LMM | Schneider et al. 2003    | DXA                 | ORT   | 7  | 33.0  | 78.0 | 180.00 | Untrained                         | Fullbody                       | 16 | 3   | 3 | 4    | 10   |       | 60%   |     |
| LMM | Schumann et al. 2014     | DXA                 | ORT   | 16 | 30.0  | 78.0 | 1.79   | Moderately physically active      | Traditional RT (Split routine) | 24 | 2_3 | 9 | 2    | 2_5  | 8_10  | 30-50 | 83% |
| LMM | Schumann et al. 2014     | DXA                 | ORT   | 18 | 30.0  | 78.0 | 1.79   |                                   | Traditional RT (Split routine) | 24 | 2_3 | 9 | 2    | 2_5  | 8_10  | 30-50 | 83% |
| LMM | Slater et al. 2001       | DXA                 | ORT   | 7  | 24.9  | 89.7 | 1.92   | 7.4 years of experience           | Not specified                  | 6  | 2_3 |   | 4    | 4_6  |       |       |     |
| LMM | Spence et al. 2011       | DXA                 | ORT   | 13 | 26.6  | 81.7 | 1.81   | Untrained                         | Traditional RT (Split routine) | 24 | 3   |   | 1.5  | 2_3  | 12_15 | 75%   |     |
| LMM | Spillane et al. 2016     | DXA                 | ORT   | 11 | 19.4  | 86.1 | 1.79   | ≥ 1 year                          | Traditional RT (Split routine) | 8  | 4   | 8 | 2    | 24   | 8_10  | 75%   |     |
| LMM | Taylor et al. 2011       | DXA                 | RT+PL | 17 | 21.0  | 85.0 | 1.79   | RT trained                        | Traditional RT (Split routine) | 8  | 4   |   | 2.5  |      | 8_10  | 75%   |     |
| LMM | Thorstensson et al. 1976 | DXA                 | RT+PL | 14 | 19-31 | 74.2 |        | Active but RT untrained           |                                | 8  | 3   |   | 3    | 6    |       |       |     |

|     |                      |              |       |    |      |      |      |                                                                                        |                                |    |     |     |     |      |      |     |
|-----|----------------------|--------------|-------|----|------|------|------|----------------------------------------------------------------------------------------|--------------------------------|----|-----|-----|-----|------|------|-----|
| LMM | Tinsley et al. 2017  | DXA          | ORT   | 18 | 22.0 | 79.0 | 1.80 |                                                                                        | Tradicional RT (Split routine) | 8  | 3   | 5.5 | 1.5 | 22   | 8_12 |     |
| LMM | Volek et al. 2004    | DXA          | RT+PL | 9  | 20.7 | 86.7 | 1.79 | 5.1 (3) years of experience                                                            | Fullbody                       | 4  | 5   | 8   | 4   | 3_12 |      |     |
| LMM | Yan et al. 2016      | DXA          | ORT   | 8  | 22.2 | 70.5 | 1.76 |                                                                                        | Fullbody                       | 5  | 2   | 1   | 1   | 5    | 10   | 70% |
| LMM | Yan et al. 2016      | DXA          | ORT   | 9  | 22.2 | 70.5 | 1.76 | Active but RT untrained                                                                |                                | 5  | 2   | 1   | 1   | 5    | 10   | 70% |
| LMM | Yan et al. 2016      | DXA          | ORT   | 8  | 22.2 | 70.5 | 1.76 |                                                                                        |                                | 5  | 2   | 1   | 1   | 5    | 10   | 70% |
| SMM | Álvarez, et al. 2012 | Antropometry | ORT   | 5  | 23.9 | 70.8 | 1.77 | Players with previous experience in RT                                                 | Tradicional RT (Split routine) | 18 | 2_3 | 6   | 4   | 12   | 5_10 | 78% |
| SMM | Álvarez, et al. 2012 | Antropometry | ORT   | 5  | 24.2 | 68.1 | 1.72 |                                                                                        | Tradicional RT (Split routine) | 18 | 2_3 | 6   | 4   | 12   | 5_10 | 78% |
| SMM | Gobbo et al. 2013    | Antropometry | ORT   | 15 | 23.1 | 72.2 | 1.78 |                                                                                        | Tradicional RT (Split routine) | 8  | 4   | 8   | 1.5 | 32   | 6_12 |     |
| SMM | Gobbo et al. 2013    | Antropometry | ORT   | 15 | 23.1 | 72.2 | 1.78 | University students, engaged in RT programs during the last 4 months before the study. | Tradicional RT (Split routine) | 8  | 4   | 8   | 1.5 | 32   | 6_12 |     |
| SMM | Gobbo et al. 2013    | Antropometry | ORT   | 15 | 23.1 | 72.2 | 1.78 |                                                                                        | Tradicional RT (Split routine) | 8  | 4   | 8   | 1.5 | 32   | 6_12 |     |
| SMM | Gobbo et al. 2013    | Antropometry | RT+PL | 15 | 23.1 | 72.2 | 1.78 |                                                                                        | Tradicional RT (Split routine) | 8  | 4   | 8   | 1.5 | 32   | 6_12 |     |
| SMM | Lockwood et al 2017  | DXA          | RT+PL | 15 | 21.8 | 78.9 | 1.78 | ≥ 3 months of RT experience                                                            | Tradicional RT                 | 8  | 4   | 8   | 1   | 24   | 5_12 |     |

|     |                       |              |       |    |      |       |      |                              |                             |    |   |   |   |      |     |
|-----|-----------------------|--------------|-------|----|------|-------|------|------------------------------|-----------------------------|----|---|---|---|------|-----|
| SMM | Maksimović et al 2016 | Antropometry | ORT   | 15 | 22   | 78.92 | 1.81 | Recreationally active        | (Split routine)<br>Fullbody | 12 | 3 | 6 | 4 | 6_12 | 88% |
| SMM | Mobley et al 2017     | DXA          | ORT   | 15 | 21   | 81    | 1.82 | Recreationally active        | Fullbody                    | 12 | 3 | 4 | 5 | 4_10 |     |
| SMM | Nunes et al 2017      | DXA          | RT+PL | 22 | 22.2 | 73.1  | 1.78 | ≥ 1.5 years of RT experience | Fullbody                    | 8  | 4 | 9 | 4 | 6_12 | 1_2 |
| SMM | Paoli et al 2015      | Antropometry | RT+PL | 19 | 24.9 |       |      |                              | Fullbody                    | 8  | 3 | 6 | 3 | 6_12 | 3   |

FFM: Fat Free Mass; SMM: Skeletal muscle mass; LMM: Lean muscle mass; DXA: Dual X ray Absorptiometry; BIA: Bioelectrical impedance analysis; RT: resistance training; PL: Placebo; ORT: Only Resistance Training; S: Supplementation; 1-RM: One repetition maximum.
